# Supplementary material
Source: publisher site journal article supplement (https://www.dovepress.com/article/438297)
Supplement: Supplementary file 1 [file get_supplementary_file.php]

**Supplementary materials**

**Table S1：Examples of searching strategies**

**（1）CNKI**

(TI = '量表' OR TI = '问卷' OR TI = '测评工具' OR TI = '测量工具' OR TI = '生命质量' OR TI = '生活质量' OR TI = '生存质量' OR TI = '患者报告' OR TI = '病人报告' OR TI = 'PRO') AND (TI = '信度' OR TI = '效度' OR TI = '反应度' OR TI = '条目' OR TI = '筛选' OR TI = '概念框架' OR TI = '理论框架' OR TI = '研制' OR TI = '编制' OR TI = '开发' OR TI = '制定' OR TI = '建立' OR TI = '构建' OR TI = '设计' OR TI = '研究' OR TI = '评价' OR TI = '考评') AND FT = '中医'

China National Knowledge Infrastructure (CKNI)

(TI, Title = '量表, scale' OR TI = '问卷, questionnaire' OR TI = '测评工具, assessment tool' OR TI = '测量工具, assessment tool' OR TI = '生命质量, quality of life' OR TI = '生活质量, quality of life' OR TI = '生存质量, quality of life' OR TI = '患者报告, patient-reported outcome' OR TI = '病人报告, patient-reported outcome' OR TI = 'PRO') AND (TI = '信度, reliability' OR TI = '效度, validity' OR TI = '反应度, responsiveness' OR TI = '条目, item' OR TI = '筛选, screening' OR TI = '概念框架, conceptual framework' OR TI = '理论框架, theoretical framework' OR TI = '研制, development' OR TI = '编制, development' OR TI = '开发, development' OR TI = '制定, development' OR TI = '建立, establishment' OR TI = '构建, construction' OR TI = '设计, design' OR TI = '研究, study' OR TI = '评价, evaluation' OR TI = '考评, assessment') AND FT, Full text = '中医, traditional Chinese medical science'

（2）PubMed

The Chinese databases were searched on February 23rd 2023 (search period: unlimited to 2022). The English databases were searched on March 5th 2023 (search period: unlimited to 2022).

#1 “Medicine, Chinese Traditional” [Mesh]

#2 “traditional Chinese medicine” [Title/Abstract] OR “TCM” [Title/Abstract]

#3 #1 OR #2

#4 “Patient Reported Outcome Measures” [Mesh] OR “quality of life” [Mesh]

#5 “Patient-reported outcome” [Title/Abstract] OR “patient reported outcome*” [Title/Abstract] OR “PRO” [Title/Abstract] OR “quality of life” [Title/Abstract] OR “QOL” [Title/Abstract]

#6 #4 OR #5

#7 “measur*” [Title/Abstract] OR “scal*” [Title/Abstract] OR “questionnaire*” [Title/Abstract] OR “scor*” [Title/Abstract] OR “instrument” [Title/Abstract] OR “assessment” [Title/Abstract] OR “tool” [Title/Abstract]

#8 #3 AND #6 AND #7

Table S2 Summary of validation status for the scales

| **Reference** | **Instrument** | **Measurement properties** | | | | | | | | |
| --- | --- | --- | --- | --- | --- | --- | --- | --- | --- | --- |
| **Content validity** | **Structural validity** | **Internal consistency** | **Cross‐cultural validity** | **Reliability** | **Measurement error** | **Criterion validity** | **Hypotheses testing for construct validity** | **Responsiveness** |
| Ren et al., 2011 [23] | TCMPRO-COPD | **√** | EFA: 7 factors  cumulative variance contribution rate: 62.736％ | Cronbach ' α coefficient of total scale: 0.899. Except for the domains of seven modes of emotions of TCM and social activities, the Cronbach ' α coefficients in other domains are all greater than 0.7. | NR | ICC:not reported  P＜0.01 | NR | NR | NR | Comparison between subgroups: P<0.001 |
| Zhou et al., 2016 [24] | PRO-COPD | **√** | EFA: 10 factors  cumulative variance contribution rate: 75.598％ | Cronbach ' α coefficient of total scale: 0.776.  Cronbach ' α coefficient of each domain: 0.824, 0.791, 0.885, 0.832, and 0.908. | NR | NR | NR | Against WHOQOL-BREF, correlation coefficient: 0.757 (P<0.001) | NR | Comparison between subgroups: P＜0.05  Before and after intervention: P＜0.01 |
| Li et al., 2011 [25] | COPD-PRO | **√** | EFA: 5 factors  cumulative variance contribution rate: 64.143％ | Cronbach ' α coefficient of total scale: 0.839.  Cronbach ' α coefficient of each domain: 0.866, 0.821, and 0.830. | NR | ICC: 0.720 (P＜0.001) | NR | NR | NR | Before and after intervention: P＜0.01 |
| Li et al., 2020 [26] | mCOPD-PRO | **√** | CFA: 3 factors  CFI=0.91 | Cronbach ' α coefficient of total scale: 0.954.  Cronbach ' α coefficient of each domain: 0.930, 0.929, and 0.673. | NR | NR | NR | Against CAT, correlation coefficient: 0.771 (P<0.001).  Against mMRC  , correlation coefficient: 0.651 (P<0.001). | NR | Comparison between subgroups: P<0.01 |
| Zhu et al., 2011 [27] | sCOPD-PRO | **√** | EFA: 4 factors  cumulative variance contribution rate: 65.06％ | Cronbach ' α coefficient of total scale: 0.88.  Cronbach ' α coefficient of each domain: 0.85, 0.77, 0.93, and 0.81. | NR | NR | NR | Against SGRQ, correlation coefficient: 0.72 (P<0.01). | NR | Comparison between subgroups: P<0.05.  Before and after intervention: P＜0.01 |
| Wei et al., 2021 [28] | CFS-COPD-PRO | NR | EFA: 3 factors  cumulative variance contribution rate: 59.89％ | Cronbach ' α coefficient of total scale: 0.956.  Cronbach ' α coefficient of each domain: 0.884 and 0.937. | NR | ICC: 0.901 (P＜0.001) | NR | NR | NR | Comparison between subgroups: P<0.05 |
| Zang et al., 2016 [29] | IPF-TQ32 | **√** | NR | Cronbach ' α coefficient of total scale: 0.987.  Cronbach ' α coefficient of each domain: 0.970, 0.958, 0.887, and 0.964. | NR | NR | NR | Against CAT, correlation coefficient: 0.820 (P<0.01). | NR |  |
| Liang et al., 2016 [30] | QOL-IPF | **√** | EFA: 5 factors.  cumulative variance contribution rate: 82％ | Cronbach ' α coefficient of total scale: 0.713. | NR | NR | NR | Against SGRQ, correlation coefficient: 0.862 (P<0.01). | NR |  |
| Li et al., 2016 [31] | CAP-PRO | **√** | EFA: 3 factors  cumulative variance contribution rate: 55.31％ | Cronbach ' α coefficient of total scale: 0.868.  Cronbach ' α coefficient of each domain: 0.846, 0.898 and 0.900. | NR | NR | NR | NR | NR | Before and after intervention: P＜0.01 |
| Diao et al., 2007 [32] | QOL - AL | **√** | EFA: 5 factors | Cronbach ' α coefficient of each domain: 0.820, 0.427, 0.799, 0.761, and 0.398. | NR | NR | NR | Against FACT-L, correlation coefficient: 0.877 (P<0.01). | NR | Before and after intervention: P＜0.001 |
| Yang et al., 2011 [33] | QLASTCM-Lu | **√** | EFA: 7 factors  cumulative variance contribution rate: 63.77％ | Cronbach ' α coefficient of each domain: 0.93, 0.85, 0.86, and 0.93. | NR | ICC: 0.96 (P＜0.001) | NR | Against QLQ-LC43 | NR | Before and after intervention: P＜0.001 |
| Wang et al., 2019 [34] | QLASTCM-Lu (modified) | NR | EFA: 12 factors  cumulative variance contribution rate: 53.03％ | Cronbach ' α coefficient of each domain: 0.872, 0.806, 0.802, 0.818, 0.904, and 0.940. | NR | NR | NR | Against QLQ-LC43  correlation coefficient: 0.808 (P<0.01). | NR | Before and after intervention: P＜0.05 |
| Guan et al., 2022 [35] | BE-PRO | **√** | CFA: 5 factors  CFI=0.961 | Cronbach ' α coefficient of total scale: 0.912.  Cronbach ' α coefficient of each domain: 0.853, 0.926, 0.821, 0.773, and 0.762 | NR | NR | NR | Against QOL-B  correlation coefficient: 0.800 (P<0.01) | NR | Before and after intervention: P＜0.001 |

**Notes: √,** have been validated;NR, Not reported.

**Abbreviations:** TCMPRO-COPD, Self-reported scale for patients with chronic obstructive pulmonary disease in traditional Chinese medicine; PRO-COPD, Patient-reported outcome instrument for chronic obstructive pulmonary disease with characters of TCM; COPD-PRO, Patient-reported outcome instrument for chronic obstructive pulmonary diseases; mCOPD-PRO, Modified patient-reported outcome scale for chronic obstructive pulmonary disease; sCOPD-PRO, Patient-reported outcome scale for patients with stable chronic obstructive pulmonary disease; CFS-COPD-PRO, Cold and fluid syndrone-COPD-patient report outcome; IPF-TQ32, Health-related quality of life of traditional Chinese medicine scale for patients with idiopathic pulmonary fibrosis; QOL-IPF, Quality of life scale for patients with idiopathic pulmonary fibrosis; CAP-PRO, Patient-reported outcome instrument for community-acquired pneumonia; QOL-AL, Quality of life scale in patients with advanced lung cancer; QLASTCM-Lu, Quality of life assessment instrument for lung cancer patients based on traditional Chinese medicine; QLASTCM-Lu (modified), Modified version of quality of life assessment instrument for lung cancer patients based on traditional Chinese medicine; BE-PRO, the scale combination of disease and syndrome of patient-reported outcomes with bronchiectasis; EFA, exploratory factor analysis; CFA, Confirmatory factor analysis; CFI, comparative fit index; ICC, intraclass correlation coefficient; WHOQOL-BREF, World Health Organization Quality of Life assessment; CAT, COPD assessment test; mMRC, modified Medical Research Council dyspnea scale; SGRQ, St Georges' Respiratory Questionnaire; FACT-L, Functional Assessment of Cancer Therapy-Lung; QLQ-LC43, Cancer-Quality of Life Questionnaire-Lung Cancer; QOL-B, Quality of life questionnaire-Bronchiectasis.
